# Supplementary material for: Functional Impact and Evolution of a Novel Human Polymorphic Inversion That Disrupts a Gene and Creates a Fusion Transcript
Source: PLoS Genet. 2015 Oct 1;11(10):e1005495. doi: 10.1371/journal.pgen.1005495 (PMC4591017; doi:10.1371/journal.pgen.1005495)
Supplement: S4 Table — Sample features and reads sequenced, mapped and analyzed in each individual. The gene annotation used is Ensembl release 73 (GENCODE v18). (XLSX) [file pgen.1005495.s009.xlsx]

## Sheet: S4
S4 Table. RNA-Seq summary information. Sample features and reads sequenced, mapped and analyzed in each individual. The gene annotation used is Ensembl release 73 (GENCODE v18).
Individual	Genotype	Sex	Population	Total read pairs	Read pairs mapped within genes	Mean reads/gene	Median reads/gene	Detected genes
NA18621	Std/Std	Male	CHB	29870932	27599119	2071.38	584	13065
NA18942	Std/Std	Female	JPT	26724893	24663310	1851.04	547	13135
NA18947	Std/Std	Female	JPT	25683681	24051125	1805.1	495	13004
NA18951	Std/Std	Female	JPT	29888147	27997216	2101.26	614	13153
NA18632	Std/Inv	Male	CHB	23799419	22593532	1695.7	488	12844
NA18956	Std/Inv	Female	JPT	22695429	21250171	1594.88	437	13040
NA18973	Std/Inv	Female	JPT	24081382	22297271	1673.47	452	12933
NA18995	Std/Inv	Male	JPT	24179140	22573494	1694.2	469	13029
Average				2.58654e+07	2.41282e+07	1810.88	510.75	13025.4
